# Supplementary material for: The Effect of Impaired Polyamine Transport on Pneumococcal Transcriptome
Source: MDPI journal article supplement (doi:10.3390/pathogens10101322), 2021-10-14
Supplement: s1 [file s1]

**Table S1. Sequences of primers used in this study**

| <b>Primers</b> | <b>Sequence (5'→3')</b>                                          |
|----------------|------------------------------------------------------------------|
| <i>speA</i>    | Rev- AAACCGAAACACCGTCTATTAATC                                    |
| <i>speE</i>    | For-TGCGGATGATTTCGTCTACAATG<br>Rev-GCTTAGTCCTGGTCGCAATC          |
| <i>SP_2127</i> | For- TGCAGCAGGCTTGTCTATTC<br>Rev- GGCATCCAATTGTGCGTATC           |
| <i>SP_2128</i> | For- TATGGTCAGAGAATAAGAAAGAGTCC<br>Rev- GTTGGATAACTGTTGATGAGAAGC |
| <i>bglG</i>    | For- TGAGAACTACCCTGAGGCAATG<br>Rev- ATTCCTATTTTCATTCACACCTTCATC  |
| <i>pcpA</i>    | For- TTCTTAATATGAATTCCTTTAATG<br>Rev- GGTAATAATATCAACTCATTGC     |
