# Supplementary material for: The Effect of Impaired Polyamine Transport on Pneumococcal Transcriptome
Source: MDPI journal article supplement (doi:10.3390/pathogens10101322), 2021-10-14
Supplement: s1 [file s1]

**Table S2. Significant changes in gene expression between *ΔpotABCD* and TIGR4 that are not included in the tables in the text.**

| Description                                                     | Locus tag | Fold change | FDR p-value |
|-----------------------------------------------------------------|-----------|-------------|-------------|
| ABC transporter permease                                        | SP_1388   | -484.5      | >0.0001     |
| ABC transporter permease                                        | SP_1387   | -378        | >0.0001     |
| Spermidine/putrescine ABC transporter substrate-binding protein | SP_1386   | -349.2      | >0.0001     |
| Spermidine/putrescine import ATP-binding protein PotA           | SP_1389   | -337.4      | >0.0001     |
| PTS beta-glucoside transporter subunit IIBCA                    | SP_1722   | -51         | >0.0001     |
| Guanosine monophosphate reductase                               | SP_1249   | -11.1       | >0.0001     |
| Sucrose-6-phosphate hydrolase                                   | SP_1724   | -10.5       | >0.0001     |
| Fructokinase                                                    | SP_1721   | -10         | >0.0001     |
| tRNA-Arg                                                        | SP_2249   | -9.8        | >0.0001     |
| LacI family transcriptional regulator                           | SP_1725   | -9.2        | >0.0001     |
| Aspartate-semialdehyde dehydrogenase                            | SP_1013   | -5.5        | >0.0001     |
| Pyridoxal 5'-phosphate synthase glutaminase subunit PdxT        | SP_1467   | -5.1        | >0.0001     |
| Pyridoxal 5'-phosphate synthase lyase subunit PdxS              | SP_1468   | -4.7        | >0.0001     |
| Trehalose operon repressor                                      | SP_1885   | -4.7        | >0.0001     |
| 4-hydroxy-tetrahydrodipicolinate synthase                       | SP_1014   | -4.3        | >0.0001     |
| Nucleotide exchange factor GrpE                                 | SP_0516   | -4.1        | >0.0001     |
| Co-chaperone GroES                                              | SP_1907   | -3.9        | >0.0001     |
| tRNA-Ser                                                        | SP_2253   | -3.9        | >0.0001     |
| tRNA-Ser                                                        | SP_2253   | -3.9        | >0.0001     |
| Transcriptional regulator                                       | SP_1131   | -3.6        | >0.0001     |
| PTS trehalose transporter subunit IIBC                          | SP_1884   | -3.6        | >0.0001     |
| Alpha-amylase                                                   | SP_1382   | -3.5        | >0.0001     |
| tRNA-Gly                                                        | SP_2264   | -3.5        | >0.0001     |
| tRNA-Gly                                                        | SP_2264   | -3.5        | >0.0001     |
| tRNA-Arg                                                        | SP_2262   | -3.4        | >0.0001     |
| tRNA-Arg                                                        | SP_2262   | -3.4        | >0.0001     |
| tRNA-Arg                                                        | SP_2274   | -3.4        | >0.0001     |
| tRNA-Arg                                                        | SP_2274   | -3.4        | >0.001      |
| Alpha <sub>2</sub> Calpha-phosphotrehalase                      | SP_1883   | -3.2        | >0.001      |
| ECF transporter S component                                     | SP_1597   | -3          | >0.001      |
| tRNA-Met                                                        | SP_2260   | -3          | >0.001      |
| Maltose PTS system EIICB or EIICBA component                    | SP_0758   | -2.9        | >0.001      |
| Hypothetical protein                                            | SP_1006   | -2.9        | >0.001      |
| tRNA-Leu                                                        | SP_2263   | -2.9        | >0.001      |
| tRNA-Leu                                                        | SP_2263   | -2.9        | >0.001      |
| tRNA-Leu                                                        | SP_2275   | -2.9        | >0.001      |

|                                                                                           |         |      |        |
|-------------------------------------------------------------------------------------------|---------|------|--------|
| tRNA-Leu                                                                                  | SP_2275 | -2.9 | >0.001 |
| tRNA-Gly                                                                                  | SP_2276 | -2.9 | >0.001 |
| tRNA-Gly                                                                                  | SP_2276 | -2.9 | >0.001 |
| Hypothetical protein                                                                      | SP_1007 | -2.8 | >0.001 |
| tRNA-Arg                                                                                  | SP_2250 | -2.8 | >0.001 |
| tRNA-Pro                                                                                  | SP_2273 | -2.8 | >0.001 |
| tRNA-Pro                                                                                  | SP_2273 | -2.8 | >0.001 |
| Hypothetical protein                                                                      | SP_1004 | -2.7 | >0.001 |
| Bifunctional pyrimidine operon transcriptional regulator/uracil phosphoribosyltransferase | SP_1278 | -2.7 | >0.001 |
| tRNA-Lys                                                                                  | SP_2267 | -2.7 | >0.001 |
| tRNA-Leu                                                                                  | SP_2284 | -2.7 | >0.001 |
| tRNA-Gly                                                                                  | SP_2293 | -2.7 | >0.001 |
| Type I addiction module toxin%2C Fst family                                               | SP_0258 | -2.6 | >0.001 |
| PTS system mannose/fructose/N-acetylgalactosamine-Transporter subunit IIB                 | SP_0323 | -2.6 | >0.001 |
| Pyridoxine kinase                                                                         | SP_1598 | -2.6 | >0.001 |
| tRNA-Gln                                                                                  | SP_2246 | -2.6 | >0.001 |
| tRNA-Pro                                                                                  | SP_2261 | -2.6 | >0.001 |
| tRNA-Thr                                                                                  | SP_2265 | -2.6 | >0.001 |
| tRNA-Thr                                                                                  | SP_2277 | -2.6 | >0.001 |
| tRNA pseudouridine(38-40) synthase TruA                                                   | SP_1599 | -2.5 | >0.001 |
| Maltodextrin ABC transporter permease                                                     | SP_2109 | -2.5 | >0.001 |
| tRNA-Gly                                                                                  | SP_2255 | -2.5 | >0.001 |
| tRNA-Lys                                                                                  | SP_2279 | -2.5 | >0.001 |
| tRNA-Trp                                                                                  | SP_2287 | -2.5 | >0.001 |
| tRNA-Glu                                                                                  | SP_2296 | -2.5 | >0.001 |
| Aspartate carbamoyltransferase                                                            | SP_1277 | -2.4 | >0.001 |
| Maltodextrin phosphorylase                                                                | SP_2106 | -2.4 | >0.001 |
| Maltose/maltodextrin-binding protein                                                      | SP_2108 | -2.4 | >0.001 |
| Maltodextrin ABC transporter permease                                                     | SP_2110 | -2.4 | >0.001 |
| RNA-His                                                                                   | SP_2286 | -2.4 | >0.001 |
| PTS N-acetylgalactosamine transporter subunit IIA                                         | SP_0321 | -2.3 | >0.001 |
| tRNA-Leu                                                                                  | SP_2266 | -2.3 | >0.001 |
| tRNA-Leu                                                                                  | SP_2278 | -2.3 | >0.001 |
| hydrolase                                                                                 | SP_0760 | -2.2 | >0.001 |
| tRNA-Ile                                                                                  | SP_2292 | -2.2 | >0.001 |
| Carbamoyl-phosphate synthase small chain                                                  | SP_1276 | -2.1 | >0.001 |
| tRNA-Ile                                                                                  | SP_2254 | -2.1 | >0.001 |
| tRNA-Tyr                                                                                  | SP_2288 | -2.1 | >0.001 |
| N-acetylgalactosamine PTS system EIID component                                           | SP_0325 | -2   | >0.001 |

|                                                                           |         |      |        |
|---------------------------------------------------------------------------|---------|------|--------|
| Phenylalanine--tRNA ligase subunit alpha                                  | SP_0579 | -2   | >0.001 |
| N-acetyltransferase                                                       | SP_0580 | -2   | >0.001 |
| Hypothetical protein                                                      | SP_1039 | -2   | >0.001 |
| FtsW/RodA/SpoVE family cell cycle protein                                 | SP_1067 | -2   | >0.001 |
| tRNA-Phe                                                                  | SP_2256 | -2   | >0.001 |
| tRNA-Met                                                                  | SP_2259 | -2   | >0.001 |
| tRNA-Phe                                                                  | SP_2289 | -2   | >0.001 |
| Adenylosuccinate synthetase                                               | SP_0019 | -1.9 | >0.001 |
| Preprotein translocase subunit YajC                                       | SP_0326 | -1.9 | 0.005  |
| Orotidine-5'-phosphate decarboxylase                                      | SP_0701 | -1.9 | >0.001 |
| Pyruvate dehydrogenase E2 component (dihydrolipoamide acetyltransferase   | SP_1162 | -1.9 | 0.003  |
| Thiamine pyrophosphate-dependent dehydrogenase E1 component subunit alpha | SP_1164 | -1.9 | 0.002  |
| Carbamoyl-phosphate synthase large chain                                  | SP_1275 | -1.9 | >0.001 |
| Collagenase-like protease                                                 | SP_1429 | -1.9 | >0.001 |
| Hypothetical protein                                                      | SP_1494 | -1.9 | 0.017  |
| Type 2 lantibiotic                                                        | SP_1948 | -1.9 | >0.001 |
| Type 2 lantibiotic                                                        | SP_1949 | -1.9 | >0.001 |
| tRNA-Gln                                                                  | SP_2285 | -1.9 | >0.001 |
| Transporter ComB                                                          | SP_0043 | -1.8 | >0.001 |
| MetQ/NlpA family ABC transporter substrate-binding protein                | SP_0149 | -1.8 | >0.001 |
| NCS2 family permease                                                      | SP_0287 | -1.8 | >0.001 |
| CPBP family intramembrane metalloprotease                                 | SP_0288 | -1.8 | >0.001 |
| Unsaturated chondroitin disaccharide hydrolase                            | SP_0322 | -1.8 | 0.002  |
| Glucan 1%2C6-alpha-glucosidase                                            | SP_0342 | -1.8 | >0.001 |
| Hypothetical protein                                                      | SP_0451 | -1.8 | >0.001 |
| Helicase                                                                  | SP_0564 | -1.8 | >0.001 |
| Orotate phosphoribosyltransferase                                         | SP_0702 | -1.8 | >0.001 |
| Saccharopine dehydrogenase                                                | SP_0919 | -1.8 | >0.001 |
| Lactoylglutathione lyase                                                  | SP_0962 | -1.8 | >0.001 |
| Peptidase T                                                               | SP_1008 | -1.8 | >0.001 |
| Phosphoenolpyruvate carboxylase                                           | SP_1068 | -1.8 | >0.001 |
| HU family DNA-binding protein                                             | SP_1113 | -1.8 | 0.026  |
| Alpha-ketoacid dehydrogenase subunit beta                                 | SP_1163 | -1.8 | 0.004  |
| chorismate mutase                                                         | SP_1296 | -1.8 | 0.002  |
| 30S ribosomal protein S21                                                 | SP_1414 | -1.8 | 0.017  |
| Hypothetical protein                                                      | SP_1427 | -1.8 | >0.001 |
| GMP synthase (glutamine-hydrolyzing)                                      | SP_1445 | -1.8 | >0.001 |
| Dead/Deah box family ATP-dependent RNA helicase                           | SP_1586 | -1.8 | 0.002  |
| tRNA guanosine (34) transglycosylase Tgt                                  | SP_2058 | -1.8 | >0.001 |
| 4-alpha-glucanotransferase                                                | SP_2107 | -1.8 | 0.003  |

|                                                                       |         |      |        |
|-----------------------------------------------------------------------|---------|------|--------|
| Bacteriocin cleavage/export ABC transporter                           | SP_0042 | -1.7 | >0.001 |
| Rhodanese domain-containing protein                                   | SP_0095 | -1.7 | >0.001 |
| N-acetylgalactosamine PTS system EIIc component                       | SP_0324 | -1.7 | 0.022  |
| Phenylalanine--tRNA ligase subunit beta                               | SP_0581 | -1.7 | >0.001 |
| Polyamine aminopropyltransferase                                      | SP_0918 | -1.7 | >0.001 |
| N-carbamoylputrescine amidase                                         | SP_0922 | -1.7 | >0.001 |
| ABC transporter ATP-binding protein                                   | SP_1035 | -1.7 | 0.010  |
| Lipoate--protein ligase A                                             | SP_1160 | -1.7 | >0.001 |
| Dihydrolipoyl dehydrogenase                                           | SP_1161 | -1.7 | >0.001 |
| Noncanonical pyrimidine nucleotidase%2C YjjG family                   | SP_1171 | -1.7 | >0.001 |
| Fluoride exporter                                                     | SP_1295 | -1.7 | >0.001 |
| Hypothetical protein                                                  | SP_1493 | -1.7 | >0.001 |
| Amino acid ABC transporter permease                                   | SP_1502 | -1.7 | >0.001 |
| XRE family transcriptional regulator                                  | SP_1946 | -1.7 | >0.001 |
| Ribonuclease P protein component                                      | SP_2042 | -1.7 | >0.001 |
| Hypothetical protein                                                  | SP_2199 | -1.7 | 0.002  |
| Hypothetical protein                                                  | SP_0122 | -1.6 | >0.001 |
| PTS mannose transporter subunit IIB                                   | SP_0284 | -1.6 | 0.019  |
| 30S ribosomal protein S9                                              | SP_0295 | -1.6 | >0.001 |
| Serine--tRNA ligase                                                   | SP_0411 | -1.6 | >0.001 |
| Amino acid ABC transporter ATP-binding protein                        | SP_0452 | -1.6 | >0.001 |
| Glutamine ABC transporter substrate-binding protein                   | SP_0453 | -1.6 | 0.025  |
| tRNA (cytidine(34)-2'-O)-methyltransferase                            | SP_0486 | -1.6 | >0.001 |
| CTP synthetase                                                        | SP_0494 | -1.6 | >0.001 |
| Aminoglycoside phosphotransferase                                     | SP_0549 | -1.6 | >0.001 |
| Ribosome maturation factor RimP                                       | SP_0552 | -1.6 | >0.001 |
| Hypothetical protein                                                  | SP_0555 | -1.6 | >0.001 |
| Ribosome-binding factor A                                             | SP_0557 | -1.6 | 0.021  |
| 5-methyltetrahydropteroyltriglutamate--homocysteine methyltransferase | SP_0585 | -1.6 | >0.001 |
| Glucokinase                                                           | SP_0668 | -1.6 | >0.001 |
| 30S ribosomal protein S20                                             | SP_0838 | -1.6 | 0.041  |
| Aminotransferase class V-fold PLP-dependent enzyme                    | SP_0916 | -1.6 | >0.001 |
| Carboxynorspermidine decarboxylase                                    | SP_0920 | -1.6 | >0.001 |
| Agmatine deiminase                                                    | SP_0921 | -1.6 | >0.001 |
| Peptide ABC transporter substrate-binding protein                     | SP_1069 | -1.6 | >0.001 |
| Type II toxin-antitoxin system RelE/ParE family toxin                 | SP_1223 | -1.6 | 0.002  |
| Uracil transporter                                                    | SP_1286 | -1.6 | >0.001 |
| 50S ribosomal protein L10                                             | SP_1355 | -1.6 | >0.001 |
| Transcription elongation factor GreA                                  | SP_1517 | -1.6 | >0.001 |
| Ferredoxin--NADP(+) reductase                                         | SP_1563 | -1.6 | >0.001 |
| MFS transporter                                                       | SP_1587 | -1.6 | >0.001 |

|                                                                                       |         |      |        |
|---------------------------------------------------------------------------------------|---------|------|--------|
| UDP-glucose 4-epimerase GalE                                                          | SP_1607 | -1.6 | >0.001 |
| 2-Cys peroxiredoxin                                                                   | SP_1651 | -1.6 | 0.024  |
| Beta-fructofuranosidase                                                               | SP_1795 | -1.6 | 0.017  |
| Hypothetical protein                                                                  | SP_1945 | -1.6 | 0.004  |
| Glycoside hydrolase family 1 protein                                                  | SP_2021 | -1.6 | 0.013  |
| PTS sugar transporter subunit IIB                                                     | SP_2023 | -1.6 | 0.003  |
| PTS lactose/cellobiose transporter subunit IIA                                        | SP_2024 | -1.6 | 0.005  |
| Glutamate--tRNA ligase                                                                | SP_2069 | -1.6 | >0.001 |
| Maltodextrose utilization protein MalA                                                | SP_2111 | -1.6 | >0.001 |
| Hypothetical protein                                                                  | SP_2115 | -1.6 | 0.003  |
| Transcriptional regulator                                                             | SP_2172 | -1.6 | >0.001 |
| Elongation factor Ts                                                                  | SP_2214 | -1.6 | 0.001  |
| tRNA-Met                                                                              | SP_2257 | -1.6 | 0.002  |
| Bifunctional 3%2C4-dihydroxy-2-butanone-4-phosphate synthase/GTP<br>cyclohydrolase II | SP_0176 | -1.5 | 0.002  |
| Hypothetical protein                                                                  | SP_0198 | -1.5 | 0.007  |
| Adenylate kinase                                                                      | SP_0231 | -1.5 | >0.001 |
| 50S ribosomal protein L13                                                             | SP_0294 | -1.5 | 0.008  |
| HIT family protein                                                                    | SP_0521 | -1.5 | >0.001 |
| tRNA (guanosine(46)-N7)-methyltransferase TrmB                                        | SP_0550 | -1.5 | >0.001 |
| Transcription termination/antitermination protein NusA                                | SP_0553 | -1.5 | >0.001 |
| DUF448 domain-containing protein                                                      | SP_0554 | -1.5 | >0.001 |
| Translation initiation factor IF-2                                                    | SP_0556 | -1.5 | 0.005  |
| DUF3042 domain-containing protein                                                     | SP_0670 | -1.5 | >0.001 |
| Translational GTPase TypA                                                             | SP_0681 | -1.5 | 0.003  |
| 30S ribosomal protein S16                                                             | SP_0775 | -1.5 | 0.042  |
| KH domain-containing protein                                                          | SP_0776 | -1.5 | 0.013  |
| DUF2829 domain-containing protein                                                     | SP_0792 | -1.5 | 0.004  |
| 30S ribosomal protein S1                                                              | SP_0862 | -1.5 | >0.001 |
| AbrB family transcriptional regulator                                                 | SP_0888 | -1.5 | 0.009  |
| Integrase                                                                             | SP_0890 | -1.5 | 0.021  |
| Iron ABC transporter permease                                                         | SP_1033 | -1.5 | >0.001 |
| ABC transporter permease                                                              | SP_1070 | -1.5 | >0.001 |
| Uridine kinase                                                                        | SP_1208 | -1.5 | >0.001 |
| DUF454 domain-containing protein                                                      | SP_1261 | -1.5 | 0.003  |
| Bifunctional oligoribonuclease/PAP phosphatase NrnA                                   | SP_1298 | -1.5 | >0.001 |
| 50S ribosomal protein L7/L12                                                          | SP_1354 | -1.5 | 0.005  |
| Chlorohydrolase                                                                       | SP_1356 | -1.5 | >0.001 |
| Regulatory protein Spx                                                                | SP_1405 | -1.5 | 0.002  |
| Glutamine ABC transporter substrate-binding protein                                   | SP_1500 | -1.5 | >0.001 |
| Amino acid ABC transporter ATP-binding protein                                        | SP_1501 | -1.5 | >0.001 |
| 30S ribosomal protein S15                                                             | SP_1626 | -1.5 | 0.012  |

|                                                      |         |      |        |
|------------------------------------------------------|---------|------|--------|
| Oxidoreductase                                       | SP_1686 | -1.5 | 0.019  |
| Aquaporin                                            | SP_1778 | -1.5 | 0.008  |
| Hypothetical protein                                 | SP_1794 | -1.5 | 0.049  |
| Hypothetical protein                                 | SP_1882 | -1.5 | 0.005  |
| PTS sugar transporter subunit IIC                    | SP_2022 | -1.5 | 0.015  |
| Transketolase                                        | SP_2030 | -1.5 | 0.002  |
| Cytidine deaminase                                   | SP_2068 | -1.5 | >0.001 |
| Transcriptional regulator                            | SP_2112 | -1.5 | >0.001 |
| Transcriptional regulator                            | SP_2119 | -1.5 | 0.008  |
| Zinc transport system ATP-binding protein AdcC       | SP_2171 | -1.5 | >0.001 |
| ABC transporter ATP-binding protein                  | SP_2196 | -1.5 | >0.001 |
| ABC transporter substrate-binding protein            | SP_2197 | -1.5 | >0.001 |
| tRNA-Ser                                             | SP_2258 | -1.5 | 0.002  |
| tRNA-Met                                             | SP_2290 | -1.5 | 0.006  |
| tRNA-Ser                                             | SP_2291 | -1.5 | 0.004  |
| DNA polymerase III subunit beta                      | SP_0002 | -1.4 | >0.001 |
| Peptidyl-tRNA hydrolase                              | SP_0005 | -1.4 | 0.005  |
| Carbonic anhydrase                                   | SP_0024 | -1.4 | >0.001 |
| PrsW family intramembrane metalloprotease            | SP_0026 | -1.4 | 0.004  |
| Amino acid ABC transporter substrate-binding protein | SP_0148 | -1.4 | 0.001  |
| 50S ribosomal protein L36                            | SP_0233 | -1.4 | 0.003  |
| 30S ribosomal protein S13                            | SP_0234 | -1.4 | 0.030  |
| 30S ribosomal protein S11                            | SP_0235 | -1.4 | 0.022  |
| PFL family protein                                   | SP_0239 | -1.4 | 0.002  |
| LLM class flavin-dependent oxidoreductase            | SP_0267 | -1.4 | 0.003  |
| DUF956 domain-containing protein                     | SP_0412 | -1.4 | 0.003  |
| Elongation factor P                                  | SP_0435 | -1.4 | >0.001 |
| DNA-directed RNA polymerase subunit delta            | SP_0481 | -1.4 | 0.003  |
| DUF3816 family protein                               | SP_0482 | -1.4 | 0.002  |
| Aromatic acid exporter family protein                | SP_0500 | -1.4 | 0.003  |
| Hypothetical protein                                 | SP_0520 | -1.4 | 0.010  |
| Oxidoreductase                                       | SP_0606 | -1.4 | 0.001  |
| DUF910 domain-containing protein                     | SP_0677 | -1.4 | 0.024  |
| DUF1027 domain-containing protein                    | SP_0767 | -1.4 | 0.002  |
| Hypothetical protein                                 | SP_0782 | -1.4 | 0.004  |
| 3-oxoacyl-ACP reductase                              | SP_0793 | -1.4 | 0.011  |
| U32 family peptidase                                 | SP_0801 | -1.4 | 0.001  |
| BMP family ABC transporter substrate-binding protein | SP_0845 | -1.4 | 0.031  |
| DNA topoisomerase IV subunit B                       | SP_0852 | -1.4 | >0.001 |
| N-acetyltransferase                                  | SP_0953 | -1.4 | 0.007  |
| 50S ribosomal protein L35                            | SP_0960 | -1.4 | >0.001 |
| 50S ribosomal protein L20                            | SP_0961 | -1.4 | 0.008  |

|                                                             |         |      |        |
|-------------------------------------------------------------|---------|------|--------|
| Dihydroorotate dehydrogenase electron transfer subunit      | SP_0963 | -1.4 | 0.001  |
| Preprotein translocase subunit SecG                         | SP_0974 | -1.4 | 0.037  |
| SsrA-binding protein                                        | SP_0976 | -1.4 | >0.001 |
| Tellurite methyltransferase                                 | SP_0977 | -1.4 | >0.001 |
| Thymidine kinase                                            | SP_1018 | -1.4 | >0.001 |
| Iron ABC transporter permease                               | SP_1034 | -1.4 | >0.001 |
| Phosphonate ABC transporter ATP-binding protein             | SP_1071 | -1.4 | 0.013  |
| Hypothetical protein                                        | SP_1080 | -1.4 | 0.008  |
| CYTH domain-containing protein                              | SP_1096 | -1.4 | 0.014  |
| ABC transporter ATP-binding protein                         | SP_1114 | -1.4 | 0.004  |
| Site-specific integrase                                     | SP_1129 | -1.4 | >0.001 |
| Hypothetical protein                                        | SP_1140 | -1.4 | 0.026  |
| L-lactate dehydrogenase                                     | SP_1220 | -1.4 | 0.034  |
| Phosphopantothenate--cysteine ligase                        | SP_1230 | -1.4 | 0.032  |
| Fluoride exporter                                           | SP_1294 | -1.4 | 0.006  |
| Class I SAM-dependent rRNA methyltransferase                | SP_1378 | -1.4 | 0.005  |
| PLP-dependent aminotransferase family protein               | SP_1393 | -1.4 | 0.003  |
| GntR family transcriptional regulator                       | SP_1446 | -1.4 | 0.009  |
| NADH oxidase                                                | SP_1469 | -1.4 | 0.038  |
| DUF896 domain-containing protein                            | SP_1473 | -1.4 | 0.005  |
| Glycine--tRNA ligase subunit beta                           | SP_1474 | -1.4 | 0.005  |
| Glycine--tRNA ligase subunit alpha                          | SP_1475 | -1.4 | >0.001 |
| ATP synthase subunit delta                                  | SP_1511 | -1.4 | 0.005  |
| Endolytic transglycosylase MltG                             | SP_1518 | -1.4 | 0.016  |
| Aminopeptidase P family protein                             | SP_1591 | -1.4 | 0.002  |
| Hypothetical protein                                        | SP_1602 | -1.4 | 0.004  |
| Glycosyltransferase                                         | SP_1606 | -1.4 | >0.001 |
| 1-acyl-sn-glycerol-3-phosphate acyltransferase              | SP_1624 | -1.4 | 0.007  |
| 2%2C3-bisphosphoglycerate-dependent phosphoglycerate mutase | SP_1655 | -1.4 | 0.042  |
| Isoleucine--tRNA ligase                                     | SP_1659 | -1.4 | 0.015  |
| Thioredoxin                                                 | SP_1776 | -1.4 | 0.010  |
| DUF421 domain-containing protein                            | SP_1841 | -1.4 | 0.030  |
| DUF3290 domain-containing protein                           | SP_1844 | -1.4 | 0.009  |
| Asparagine synthetase A                                     | SP_1970 | -1.4 | 0.007  |
| C4-dicarboxylate ABC transporter                            | SP_2017 | -1.4 | 0.005  |
| Glycerol-3-phosphate dehydrogenase (NAD(P)(+))              | SP_2091 | -1.4 | >0.001 |
| Tyrosine--tRNA ligase                                       | SP_2100 | -1.4 | 0.011  |
| 30S ribosomal protein S2                                    | SP_2215 | -1.4 | 0.015  |
| Chromosomal replication initiator protein DnaA              | SP_0001 | -1.3 | 0.003  |
| Redox-regulated ATPase YchF                                 | SP_0004 | -1.3 | 0.030  |
| Histidine phosphatase family protein                        | SP_0022 | -1.3 | 0.029  |
| GntR family transcriptional regulator                       | SP_0058 | -1.3 | 0.007  |

|                                                                                               |         |      |        |
|-----------------------------------------------------------------------------------------------|---------|------|--------|
| Hypothetical protein                                                                          | SP_0142 | -1.3 | 0.041  |
| Peptidase M20                                                                                 | SP_0150 | -1.3 | 0.024  |
| Flavoprotein NrdI                                                                             | SP_0158 | -1.3 | >0.001 |
| Bifunctional diaminohydroxyphosphoribosylaminopyrimidine                                      |         |      |        |
| Deaminase/5-amino-6-(5-phosphoribosylamino) uracil reductase RibD                             | SP_0178 | -1.3 | 0.020  |
| LD-carboxypeptidase                                                                           | SP_0182 | -1.3 | >0.001 |
| Translation initiation factor IF-1                                                            | SP_0232 | -1.3 | 0.050  |
| DNA-directed RNA polymerase subunit alpha                                                     | SP_0236 | -1.3 | 0.034  |
| Carboxymuconolactone decarboxylase family protein                                             | SP_0409 | -1.3 | 0.034  |
| N utilization substance protein B                                                             | SP_0433 | -1.3 | 0.007  |
| Asp23/Gls24 family envelope stress response protein                                           | SP_0434 | -1.3 | 0.009  |
| Asp-Trna (Asn)/Glu-tRNA (Gln) amidotransferase GatCAB subunit C                               | SP_0438 | -1.3 | 0.016  |
| Thymidylate synthase                                                                          | SP_0669 | -1.3 | >0.001 |
| DUF3165 domain-containing protein                                                             | SP_0682 | -1.3 | 0.025  |
| Transcriptional regulator                                                                     | SP_0716 | -1.3 | 0.011  |
| Hydroxyethylthiazole kinase                                                                   | SP_0717 | -1.3 | 0.039  |
| Branched-chain amino acid ABC transporter substrate-binding protein                           | SP_0749 | -1.3 | 0.007  |
| Branched-chain amino acid ABC transporter permease                                            | SP_0750 | -1.3 | 0.010  |
| ABC transporter ATP-binding protein                                                           | SP_0753 | -1.3 | 0.027  |
| Peptidylprolyl isomerase                                                                      | SP_0771 | -1.3 | 0.012  |
| Hypothetical protein                                                                          | SP_0781 | -1.3 | 0.027  |
| Fe-S cluster assembly ATPase SufC                                                             | SP_0867 | -1.3 | 0.028  |
| Alpha/beta hydrolase                                                                          | SP_0882 | -1.3 | 0.041  |
| LysR family transcriptional regulator                                                         | SP_0927 | -1.3 | 0.043  |
| FADH (2)-oxidizing methylenetetrahydrofolate--tRNA-(uracil(54)-C (5))-methyltransferase TrmFO | SP_0943 | -1.3 | 0.007  |
| Ribonuclease R                                                                                | SP_0975 | -1.3 | 0.054  |
| Bifunctional N-acetylglucosamine-1-phosphate                                                  |         |      |        |
| Uridyltransferase/glucosamine-1-phosphate acetyltransferase                                   | SP_0988 | -1.3 | 0.023  |
| Hypothetical protein                                                                          | SP_1003 | -1.3 | 0.038  |
| Tautomerase                                                                                   | SP_1017 | -1.3 | 0.036  |
| Serine recombinase                                                                            | SP_1040 | -1.3 | 0.027  |
| MFS transporter                                                                               | SP_1116 | -1.3 | 0.004  |
| Uracil-DNA glycosylase                                                                        | SP_1169 | -1.3 | 0.023  |
| Type II restriction endonuclease                                                              | SP_1221 | -1.3 | 0.016  |
| Type II restriction endonuclease                                                              | SP_1222 | -1.3 | >0.001 |
| 3-isopropylmalate dehydrogenase                                                               | SP_1250 | -1.3 | 0.048  |
| Endonuclease                                                                                  | SP_1251 | -1.3 | 0.027  |
| Endonuclease III                                                                              | SP_1279 | -1.3 | >0.001 |
| Zinc metalloprotease HtpX                                                                     | SP_1283 | -1.3 | 0.018  |
| LemA family protein                                                                           | SP_1284 | -1.3 | >0.001 |
| Flavodoxin                                                                                    | SP_1297 | -1.3 | 0.034  |
| UDP-N-acetylenolpyruvoylglucosamine reductase                                                 | SP_1384 | -1.3 | 0.005  |



|                                                                  |         |      |        |
|------------------------------------------------------------------|---------|------|--------|
| ATP synthase epsilon chain                                       | SP_1507 | -1.3 | 0.030  |
| ATP synthase subunit alpha                                       | SP_1510 | -1.3 | 0.039  |
| ATP synthase subunit C                                           | SP_1514 | -1.3 | 0.049  |
| N-acetyltransferase                                              | SP_1516 | -1.3 | 0.011  |
| Manganese-dependent inorganic pyrophosphatase                    | SP_1534 | -1.3 | 0.026  |
| Hypothetical protein                                             | SP_1537 | -1.3 | 0.019  |
| NAD(P)H-dependent oxidoreductase                                 | SP_1546 | -1.3 | 0.002  |
| Cation transporter                                               | SP_1552 | -1.3 | >0.001 |
| 1%2C4-beta-N-acetylmuramidase                                    | SP_1573 | -1.3 | 0.052  |
| Triose-phosphate isomerase                                       | SP_1574 | -1.3 | 0.032  |
| MFS transporter                                                  | SP_1600 | -1.3 | 0.039  |
| Hypothetical protein                                             | SP_1604 | -1.3 | 0.009  |
| tRNA (adenine-N(1))-methyltransferase                            | SP_1610 | -1.3 | 0.032  |
| ISL3 family transposase                                          | SP_1692 | -1.3 | 0.037  |
| Aromatic acid exporter family protein                            | SP_1754 | -1.3 | 0.012  |
| Replication-associated recombination protein A                   | SP_1790 | -1.3 | 0.015  |
| UTP--glucose-1-phosphate uridylyltransferase                     | SP_1867 | -1.3 | 0.013  |
| membrane protein insertion efficiency factor YidD                | SP_1873 | -1.3 | >0.001 |
| Membrane protein                                                 | SP_2027 | -1.3 | 0.024  |
| Low molecular weight phosphotyrosine protein phosphatase         | SP_2028 | -1.3 | 0.004  |
| Class I SAM-dependent methyltransferase                          | SP_2045 | -1.3 | 0.005  |
| Histidine--tRNA ligase                                           | SP_2121 | -1.3 | 0.021  |
| SPFH domain-containing protein                                   | SP_2156 | -1.3 | 0.019  |
| Zinc-binding lipoprotein AdcA                                    | SP_2169 | -1.3 | >0.001 |
| ABC transporter permease                                         | SP_2198 | -1.3 | 0.012  |
| Ribose-phosphate pyrophosphokinase                               | SP_0031 | 1.3  | 0.038  |
| L-serine ammonia-lyase%2C iron-sulfur-dependent%2C subunit alpha | SP_0105 | 1.3  | 0.009  |
| Lactococcin 972 family bacteriocin                               | SP_0109 | 1.3  | 0.038  |
| Amino acid ABC transporter permease                              | SP_0110 | 1.3  | 0.004  |
| Glycoside hydrolase                                              | SP_0135 | 1.3  | 0.037  |
| DUF624 domain-containing protein                                 | SP_0154 | 1.3  | 0.027  |
| Hypothetical protein                                             | SP_0157 | 1.3  | 0.024  |
| Excinuclease ABC subunit A                                       | SP_0186 | 1.3  | 0.002  |
| Hypothetical protein                                             | SP_0352 | 1.3  | 0.017  |
| Restriction endonuclease subunit S                               | SP_0505 | 1.3  | 0.044  |
| UvrABC system protein C                                          | SP_0618 | 1.3  | >0.001 |
| Metallophosphoesterase                                           | SP_0619 | 1.3  | >0.001 |
| Sensor histidine kinase                                          | SP_0662 | 1.3  | 0.008  |
| Thiamine/molybdopterin biosynthesis protein                      | SP_0695 | 1.3  | 0.034  |
| ATP-dependent Clp protease ATP-binding subunit                   | SP_0820 | 1.3  | 0.042  |
| DNA polymerase III subunit alpha                                 | SP_0895 | 1.3  | 0.020  |
| Endo-beta-N-acetylglucosaminidase                                | SP_0965 | 1.3  | >0.001 |

|                                                               |         |     |        |
|---------------------------------------------------------------|---------|-----|--------|
| RNA methyltransferase                                         | SP_1029 | 1.3 | 0.009  |
| XRE family transcriptional regulator                          | SP_1144 | 1.3 | 0.032  |
| ATP-dependent helicase/nuclease subunit A                     | SP_1152 | 1.3 | 0.018  |
| Hypothetical protein                                          | SP_1153 | 1.3 | >0.001 |
| Glucose-6-phosphate 1-dehydrogenase                           | SP_1243 | 1.3 | 0.042  |
| Signal recognition particle-docking protein FtsY              | SP_1244 | 1.3 | 0.027  |
| Cof-type HAD-IIB family hydrolase                             | SP_1246 | 1.3 | 0.003  |
| Choline kinase                                                | SP_1269 | 1.3 | 0.024  |
| DNA-binding protein                                           | SP_1292 | 1.3 | 0.035  |
| MBL fold metallo-hydrolase                                    | SP_1646 | 1.3 | 0.002  |
| MurR/RpiR family transcriptional regulator                    | SP_1674 | 1.3 | >0.001 |
| Hypothetical protein                                          | SP_1728 | 1.3 | 0.014  |
| Primosomal protein N'                                         | SP_1736 | 1.3 | 0.019  |
| ImmA/IrrE family metallo-endopeptidase                        | SP_1809 | 1.3 | 0.010  |
| Polyketide cyclase                                            | SP_1862 | 1.3 | 0.008  |
| MarR family transcriptional regulator                         | SP_1863 | 1.3 | 0.006  |
| RNA methyltransferase                                         | SP_1901 | 1.3 | 0.006  |
| PDZ domain-containing protein                                 | SP_1967 | 1.3 | 0.016  |
| Thiamine diphosphokinase                                      | SP_1982 | 1.3 | >0.001 |
| Ribulose-phosphate 3-epimerase                                | SP_1983 | 1.3 | 0.005  |
| XRE family transcriptional regulator                          | SP_1989 | 1.3 | 0.027  |
| Methyltransferase domain-containing protein                   | SP_2103 | 1.3 | 0.007  |
| Hypothetical protein                                          | SP_2187 | 1.3 | 0.005  |
| DNA-binding response regulator                                | SP_2193 | 1.3 | 0.002  |
| Rod shape-determining protein MreD                            | SP_2217 | 1.3 | >0.001 |
| Cell shape-determining protein MreC                           | SP_2218 | 1.3 | 0.012  |
| Energy-coupling factor transporter transmembrane protein EcFT | SP_2219 | 1.3 | 0.009  |
| Hypothetical protein                                          | SP_0077 | 1.4 | 0.028  |
| Phosphoglycolate phosphatase                                  | SP_0104 | 1.4 | 0.001  |
| Pullulanase                                                   | SP_0268 | 1.4 | >0.001 |
| Lanthionine synthetase                                        | SP_0380 | 1.4 | 0.014  |
| DNA-binding response regulator                                | SP_0387 | 1.4 | 0.002  |
| Hypothetical protein                                          | SP_0679 | 1.4 | 0.026  |
| Energy coupling factor transporter S component ThiW           | SP_0723 | 1.4 | 0.037  |
| Hydroxyethylthiazole kinase                                   | SP_0724 | 1.4 | 0.017  |
| Foldase                                                       | SP_0981 | 1.4 | 0.002  |
| Glucose-1-phosphate adenylyltransferase                       | SP_1122 | 1.4 | 0.005  |
| Glucose-1-phosphate adenylyltransferase subunit GlgD          | SP_1123 | 1.4 | 0.002  |
| Glycogen synthase                                             | SP_1124 | 1.4 | >0.001 |
| N-acetyltransferase                                           | SP_1419 | 1.4 | 0.008  |
| Class I SAM-dependent methyltransferase                       | SP_1578 | 1.4 | 0.004  |
| Hypothetical protein                                          | SP_1641 | 1.4 | 0.008  |

|                                                             |         |     |        |
|-------------------------------------------------------------|---------|-----|--------|
| ABC transporter permease                                    | SP_1652 | 1.4 | 0.008  |
| Hypothetical protein                                        | SP_1703 | 1.4 | 0.030  |
| Type II toxin-antitoxin system HicB family antitoxin        | SP_1786 | 1.4 | >0.001 |
| Hypothetical protein                                        | SP_1810 | 1.4 | 0.005  |
| Nicotinamide riboside transporter PnuC                      | SP_1859 | 1.4 | 0.030  |
| Glycine/betaine ABC transporter permease                    | SP_1860 | 1.4 | 0.003  |
| ABC transporter ATP-binding protein                         | SP_1861 | 1.4 | 0.004  |
| DNA recombination protein RmuC                              | SP_1981 | 1.4 | >0.001 |
| Hypothetical protein                                        | SP_2005 | 1.4 | 0.044  |
| Sigma-70 family RNA polymerase sigma factor                 | SP_2006 | 1.4 | 0.014  |
| MarR family transcriptional regulator                       | SP_2062 | 1.4 | 0.042  |
| Gamma-glutamyl-gamma-aminobutyrate hydrolase family protein | SP_2072 | 1.4 | 0.026  |
| YhgE/Pip domain-containing protein                          | SP_2233 | 1.4 | 0.030  |
| Sigma-70 family RNA polymerase sigma factor                 | SP_0014 | 1.5 | 0.007  |
| DUF4299 domain-containing protein                           | SP_0096 | 1.5 | 0.006  |
| Hypothetical protein                                        | SP_0117 | 1.5 | 0.001  |
| DNA-binding response regulator                              | SP_0156 | 1.5 | >0.001 |
| Alcohol dehydrogenase AdhP                                  | SP_0285 | 1.5 | >0.001 |
| Sensor histidine kinase                                     | SP_0386 | 1.5 | >0.001 |
| Hypothetical protein                                        | SP_0389 | 1.5 | 0.003  |
| Hypothetical protein                                        | SP_0449 | 1.5 | 0.005  |
| Integrase                                                   | SP_0506 | 1.5 | 0.005  |
| ATP-binding protein                                         | SP_0570 | 1.5 | 0.001  |
| Hypothetical protein                                        | SP_0721 | 1.5 | 0.001  |
| Hypothetical protein                                        | SP_0826 | 1.5 | 0.002  |
| DUF1919 domain-containing protein                           | SP_0907 | 1.5 | 0.005  |
| GTP pyrophosphokinase                                       | SP_1097 | 1.5 | 0.046  |
| Glycogen-branching enzyme                                   | SP_1121 | 1.5 | >0.001 |
| Immunoglobulin A1 protease                                  | SP_1154 | 1.5 | 0.002  |
| 6-phospho-beta-galactosidase                                | SP_1184 | 1.5 | 0.054  |
| Nicotinate phosphoribosyltransferase                        | SP_1421 | 1.5 | >0.001 |
| ABC transporter ATP-binding protein                         | SP_1580 | 1.5 | >0.001 |
| Hypothetical protein                                        | SP_1635 | 1.5 | 0.022  |
| N-acetyltransferase                                         | SP_1807 | 1.5 | 0.002  |
| Galactose-1-phosphate uridylyltransferase                   | SP_1829 | 1.5 | 0.006  |
| ABC transporter ATP-binding protein                         | SP_2003 | 1.5 | 0.047  |
| Type II/IV secretion system protein                         | SP_2053 | 1.5 | 0.010  |
| Sensor histidine kinase                                     | SP_2192 | 1.5 | >0.001 |
| ABC transporter ATP-binding protein                         | SP_0242 | 1.6 | 0.001  |
| ECF transporter S component                                 | SP_0488 | 1.6 | >0.001 |
| ABC transporter ATP-binding protein                         | SP_0707 | 1.6 | 0.002  |
| Amino acid ABC transporter ATP-binding protein              | SP_0709 | 1.6 | 0.002  |

|                                                       |         |     |        |
|-------------------------------------------------------|---------|-----|--------|
| Protein kinase                                        | SP_1061 | 1.6 | 0.003  |
| NAD (+) kinase                                        | SP_1098 | 1.6 | >0.001 |
| Hypothetical protein                                  | SP_1145 | 1.6 | >0.001 |
| Transcription antiterminator                          | SP_1187 | 1.6 | 0.005  |
| ABC transporter ATP-binding protein                   | SP_1282 | 1.6 | >0.001 |
| Hypothetical protein                                  | SP_1385 | 1.6 | >0.001 |
| NAD (+) synthetase                                    | SP_1420 | 1.6 | >0.001 |
| Hypothetical protein                                  | SP_1452 | 1.6 | 0.002  |
| Hypothetical protein                                  | SP_1679 | 1.6 | 0.001  |
| Transposase                                           | SP_1806 | 1.6 | >0.001 |
| UDP-glucose 4-epimerase GalE                          | SP_1867 | 1.6 | >0.001 |
| PTS ascorbate transporter subunit IIC                 | SP_2038 | 1.6 | 0.032  |
| Membrane protein                                      | SP_2132 | 1.6 | >0.001 |
| PTS ascorbate transporter subunit IIC                 | SP_2133 | 1.6 | >0.001 |
| Choline-binding protein A                             | SP_2190 | 1.6 | >0.001 |
| Endo-alpha-N-acetylgalactosaminidase                  | SP_0368 | 1.7 | 0.011  |
| Transporter                                           | SP_0385 | 1.7 | >0.001 |
| Transcription antiterminator                          | SP_0395 | 1.7 | 0.032  |
| ISL3 family transposase                               | SP_0460 | 1.7 | 0.004  |
| Peptidase M50 family protein                          | SP_0694 | 1.7 | 0.031  |
| PspC domain-containing protein                        | SP_0910 | 1.7 | >0.001 |
| ABC transporter ATP-binding protein                   | SP_0957 | 1.7 | 0.002  |
| Phosphate acetyltransferase                           | SP_1100 | 1.7 | >0.001 |
| Type II toxin-antitoxin system RelE/ParE family toxin | SP_1143 | 1.7 | >0.001 |
| 1-alkyl-2-acetylglycerophosphocholine esterase        | SP_1450 | 1.7 | >0.001 |
| Cof-type HAD-IIB family hydrolase                     | SP_1451 | 1.7 | >0.001 |
| Hypothetical protein                                  | SP_1562 | 1.7 | 0.031  |
| PRD domain-containing protein                         | SP_1621 | 1.7 | 0.001  |
| DUF4162 domain-containing protein                     | SP_1717 | 1.7 | >0.001 |
| DUF2273 domain-containing protein                     | SP_1803 | 1.7 | 0.005  |
| CsbD family protein                                   | SP_1805 | 1.7 | >0.001 |
| Metal-sulfur cluster assembly factor                  | SP_2125 | 1.7 | >0.001 |
| Alpha-1%2C2-mannosidase                               | SP_2145 | 1.7 | >0.001 |
| Iron ABC transporter substrate-binding protein        | SP_0243 | 1.8 | 0.001  |
| Trans-2-decenoyl-[acyl-carrier protein] isomerase     | SP_0415 | 1.8 | 0.027  |
| Quorum-sensing system pheromone BfpC                  | SP_0528 | 1.8 | 0.011  |
| RluA family pseudouridine synthase                    | SP_1099 | 1.8 | >0.001 |
| Lactose PTS system EIICB component                    | SP_1185 | 1.8 | 0.002  |
| ROK family protein                                    | SP_1324 | 1.8 | 0.022  |
| Site-specific DNA-methyltransferase                   | SP_1431 | 1.8 | >0.001 |
| ROK family protein                                    | SP_1675 | 1.8 | >0.001 |
| DUF624 domain-containing protein                      | SP_1677 | 1.8 | 0.001  |

|                                                      |         |     |        |
|------------------------------------------------------|---------|-----|--------|
| LacI family transcriptional regulator                | SP_1799 | 1.8 | >0.001 |
| Aspartate aminotransferase                           | SP_1800 | 1.8 | 0.001  |
| Asp23/Gls24 family envelope stress response protein  | SP_1804 | 1.8 | >0.001 |
| DUF1304 domain-containing protein                    | SP_2061 | 1.8 | >0.001 |
| Dihydroxy-acid dehydratase                           | SP_2126 | 1.8 | >0.001 |
| L-fucose isomerase                                   | SP_2158 | 1.8 | >0.001 |
| D-alanine--poly(phosphoribitol) ligase               | SP_2176 | 1.8 | >0.001 |
| Isoprenylcysteine carboxyl methyltransferase         | SP_2191 | 1.8 | >0.001 |
| Ribosomal subunit interface protein                  | SP_2206 | 1.8 | >0.001 |
| ATP-dependent Clp protease ATP-binding subunit       | SP_0338 | 1.9 | >0.001 |
| Pts system mannitol-specific eicb component          | SP_0394 | 1.9 | >0.001 |
| Hypothetical protein                                 | SP_0430 | 1.9 | 0.002  |
| CPBP family intramembrane metalloprotease            | SP_0547 | 1.9 | >0.001 |
| Hypothetical protein                                 | SP_0558 | 1.9 | 0.001  |
| Hypothetical protein                                 | SP_0696 | 1.9 | 0.008  |
| Amino acid ABC transporter permease                  | SP_0710 | 1.9 | >0.001 |
| Hypothetical protein                                 | SP_0956 | 1.9 | >0.001 |
| ABC transporter permease                             | SP_0958 | 1.9 | 0.000  |
| PTS fructose transporter subunit IIB                 | SP_1197 | 1.9 | 0.008  |
| V-type ATP synthase subunit D                        | SP_1315 | 1.9 | 0.021  |
| V-type ATP synthase subunit C                        | SP_1319 | 1.9 | 0.003  |
| Hypothetical protein                                 | SP_1350 | 1.9 | 0.050  |
| N-acetylneuraminate lyase                            | SP_1676 | 1.9 | >0.001 |
| YhcH/YjgK/YiaL family protein                        | SP_1680 | 1.9 | >0.001 |
| Carbohydrate ABC transporter permease                | SP_1681 | 1.9 | >0.001 |
| ABC transporter ATP-binding protein                  | SP_1704 | 1.9 | >0.001 |
| Hypothetical protein                                 | SP_1706 | 1.9 | >0.001 |
| Hypothetical protein                                 | SP_1708 | 1.9 | >0.001 |
| Hypothetical protein                                 | SP_2071 | 1.9 | 0.037  |
| Hypothetical protein                                 | SP_2122 | 1.9 | >0.001 |
| D-alanyl-lipoteichoic acid biosynthesis protein DltD | SP_2173 | 1.9 | >0.001 |
| D-alanine--poly(phosphoribitol) ligase subunit 2     | SP_2174 | 1.9 | >0.001 |
| D-alanyl-lipoteichoic acid biosynthesis protein DltB | SP_2175 | 1.9 | >0.001 |
